# Supplementary material for: Pentafluoropropionic Anhydride Derivatization and GC-MS Analysis of Histamine, Agmatine, Putrescine, and Spermidine: Effects of Solvents and Starting Column Temperature
Source: MDPI journal article supplement (doi:10.3390/molecules28030939), 2023-01-17
Supplement: s1 [file s1]

## SUPPLEMENT

### Simultaneous pentafluoropropionic anhydride derivatization and GC-MS analysis of histamine, agmatine, putrescine and spermidine: Effects of solvents and starting column temperature

Dimitrios Tsikas,<sup>1</sup> Bibiana Beckmann,<sup>1</sup> Svetlana Baskal,<sup>1</sup> Gorig Brunner<sup>1</sup>

<sup>1</sup>Hannover Medical School, Institute of Toxicology, Core Unit Proteomics, 30623 Hannover, Germany

Table S1. Summary of the results obtained from simultaneous GC-MS analyses in duplicate (a, b) of mixtures of putrescine, agmatine, spermidine and histamine at the indicated amounts after derivatization and extraction. The extraction solvent for the derivatives was either ethyl acetate (EA) or toluene (TOL). Selected ion monitoring of the indicated mass-to-charge ratios ( $m/z$ ). The GC oven program was OTP40 (starting at 40 °C) or OTP70 (starting at 70 °C). Abbreviations: PA, peak area; PAR, peak area ratio; R, ratio;  $t_R$ , retention time. The experimental conditions are described in the Section 2.3. and the Results are reported in the Section 3.5.

| PUTRESCINE<br>$m/z$ 340 | EA                     |                        | TOL                     |                         | OTP40                     | OTP70                     | EA                          | TOL                          |
|-------------------------|------------------------|------------------------|-------------------------|-------------------------|---------------------------|---------------------------|-----------------------------|------------------------------|
| Amount (pmol)           | PA <sub>EA</sub> OTP40 | PA <sub>EA</sub> OTP70 | PA <sub>TOL</sub> OTP40 | PA <sub>TOL</sub> OTP70 | R <sub>EA/TOL</sub> OTP40 | R <sub>EA/TOL</sub> OTP70 | R <sub>EA</sub> OTP40/OTP70 | R <sub>TOL</sub> OTP40/OTP70 |
| 60a                     | 62534                  | 296                    | 63860                   | 757                     | 0.979                     | 0.391                     | 211                         | 84                           |
| 60b                     | 62095                  | 212                    | 63161                   | 570                     | 0.983                     | 0.371                     | 293                         | 111                          |
| 120a                    | 168182                 | 614                    | 161580                  | 1075                    | 1.041                     | 0.571                     | 274                         | 150                          |
| 120b                    | 173450                 | 654                    | 168038                  | 1012                    | 1.032                     | 0.646                     | 265                         | 166                          |
| 180a                    | 239812                 | 721                    | 260606                  | 1753                    | 0.920                     | 0.411                     | 333                         | 149                          |
| 180b                    | 247399                 | 786                    | 253649                  | 1797                    | 0.975                     | 0.437                     | 315                         | 141                          |
| 240a                    | 310732                 | 930                    | 357968                  | 2656                    | 0.868                     | 0.350                     | 334                         | 135                          |
| 240b                    | 304258                 | 958                    | 337824                  | 3287                    | 0.901                     | 0.291                     | 318                         | 103                          |
| 300a                    | 429929                 | 1336                   | 423857                  | 3894                    | 1.014                     | 0.343                     | 322                         | 109                          |
| 300b                    | 406646                 | 1166                   | 406223                  | 3618                    | 1.001                     | 0.322                     | 349                         | 112                          |
| Mean $t_R$ (min)        | 7.945                  | 4.035                  | 7.942                   | 4.027                   |                           |                           | 1.96                        | 1.97                         |

| AGMATINE<br><i>m/z</i> 528      | EA                     |                        | TOL                     |                         | OTP40                     | OTP70                     | EA                          | TOL                          |
|---------------------------------|------------------------|------------------------|-------------------------|-------------------------|---------------------------|---------------------------|-----------------------------|------------------------------|
| Amount (pmol)                   | PA <sub>EA</sub> OTP40 | PA <sub>EA</sub> OTP70 | PA <sub>TOL</sub> OTP40 | PA <sub>TOL</sub> OTP70 | R <sub>EA/TOL</sub> OTP40 | R <sub>EA/TOL</sub> OTP70 | R <sub>EA</sub> OTP40/OTP70 | R <sub>TOL</sub> OTP40/OTP70 |
| 60a                             | 21430                  | 33465                  | 24432                   | 25068                   | 0.877                     | 1.335                     | 0.64                        | 0.97                         |
| 60b                             | 21307                  | 38847                  | 23903                   | 26447                   | 0.891                     | 1.469                     | 0.55                        | 0.90                         |
| 120a                            | 67974                  | 101324                 | 57593                   | 69213                   | 1.180                     | 1.464                     | 0.67                        | 0.83                         |
| 120b                            | 69385                  | 107334                 | 60698                   | 70173                   | 1.143                     | 1.530                     | 0.65                        | 0.86                         |
| 180a                            | 93127                  | 140762                 | 110015                  | 127303                  | 0.846                     | 1.106                     | 0.66                        | 0.86                         |
| 180b                            | 100583                 | 145011                 | 106576                  | 131063                  | 0.944                     | 1.106                     | 0.69                        | 0.81                         |
| 240a                            | 134427                 | 205188                 | 160957                  | 184018                  | 0.835                     | 1.115                     | 0.66                        | 0.87                         |
| 240b                            | 137474                 | 208022                 | 149450                  | 197940                  | 0.920                     | 1.051                     | 0.66                        | 0.76                         |
| 300a                            | 207879                 | 324005                 | 198588                  | 258577                  | 1.047                     | 1.253                     | 0.64                        | 0.77                         |
| 300b                            | 195112                 | 315898                 | 198068                  | 252510                  | 0.985                     | 1.251                     | 0.62                        | 0.78                         |
| Mean <i>t<sub>R</sub></i> (min) | 9.262                  | 7.260                  | 9.263                   | 7.262                   |                           |                           | 1.28                        | 1.28                         |

| <sup>13</sup> C <sub>0</sub> -SPERMIDINE<br><i>m/z</i> 361 | EA                     |                        | TOL                     |                         | OTP40                     | OTP70                     | EA                          | TOL                          |
|------------------------------------------------------------|------------------------|------------------------|-------------------------|-------------------------|---------------------------|---------------------------|-----------------------------|------------------------------|
| Amount (pmol)                                              | PA <sub>EA</sub> OTP40 | PA <sub>EA</sub> OTP70 | PA <sub>TOL</sub> OTP40 | PA <sub>TOL</sub> OTP70 | R <sub>EA/TOL</sub> OTP40 | R <sub>EA/TOL</sub> OTP70 | R <sub>EA</sub> OTP40/OTP70 | R <sub>TOL</sub> OTP40/OTP70 |
| 60a                                                        | 7011                   | 4525                   | 7747                    | 7357                    | 0.905                     | 0.615                     | 1.55                        | 1.05                         |
| 60b                                                        | 6595                   | 4962                   | 7259                    | 7281                    | 0.909                     | 0.681                     | 1.33                        | 1.00                         |
| 120a                                                       | 19605                  | 11339                  | 17655                   | 18366                   | 1.110                     | 0.617                     | 1.73                        | 0.96                         |
| 120b                                                       | 18815                  | 11672                  | 19094                   | 18673                   | 0.985                     | 0.625                     | 1.61                        | 1.02                         |
| 180a                                                       | 29583                  | 17787                  | 30163                   | 29515                   | 0.981                     | 0.603                     | 1.66                        | 1.02                         |
| 180b                                                       | 29654                  | 18202                  | 29051                   | 29211                   | 1.021                     | 0.623                     | 1.63                        | 0.99                         |
| 240a                                                       | 36895                  | 22041                  | 45810                   | 41753                   | 0.805                     | 0.528                     | 1.67                        | 1.10                         |
| 240b                                                       | 35888                  | 21505                  | 42847                   | 43723                   | 0.838                     | 0.492                     | 1.67                        | 0.98                         |
| 300a                                                       | 53987                  | 34203                  | 47809                   | 50248                   | 1.129                     | 0.681                     | 1.58                        | 0.95                         |
| 300b                                                       | 50923                  | 34465                  | 47132                   | 49597                   | 1.080                     | 0.695                     | 1.48                        | 0.95                         |
| Mean <i>t<sub>R</sub></i> (min)                            | 11.43                  | 9.429                  | 11.40                   | 9.429                   |                           |                           | 1.21                        | 1.21                         |

| <sup>13</sup> C <sub>4</sub> -SPERMIDINE<br><i>m/z</i> 365 | EA                     |                        | TOL                     |                         | OTP40                     | OTP70                     | EA                          | TOL                        |
|------------------------------------------------------------|------------------------|------------------------|-------------------------|-------------------------|---------------------------|---------------------------|-----------------------------|----------------------------|
| Amount (pmol)                                              | PA <sub>EA</sub> OTP40 | PA <sub>EA</sub> OTP70 | PA <sub>TOL</sub> OTP40 | PA <sub>TOL</sub> OTP70 | R <sub>EA/TOL</sub> OTP40 | R <sub>EA/TOL</sub> OTP70 | R <sub>EA</sub> OTP40/OTP70 | R <sub>T</sub> OTP40/OTP70 |
| 60a                                                        | 36188                  | 22095                  | 45576                   | 41692                   | 0.794                     | 0.530                     | 1.64                        | 1.09                       |
| 60b                                                        | 34640                  | 25702                  | 45735                   | 44035                   | 0.757                     | 0.584                     | 1.35                        | 1.04                       |
| 120a                                                       | 53067                  | 30300                  | 44618                   | 45387                   | 1.189                     | 0.668                     | 1.75                        | 0.98                       |
| 120b                                                       | 50797                  | 33198                  | 46887                   | 46051                   | 1.083                     | 0.721                     | 1.53                        | 1.02                       |
| 180a                                                       | 52552                  | 32820                  | 55979                   | 52500                   | 0.939                     | 0.625                     | 1.30                        | 1.07                       |
| 180b                                                       | 53626                  | 33625                  | 52577                   | 53084                   | 1.020                     | 0.633                     | 1.59                        | 0.99                       |
| 240a                                                       | 53619                  | 34883                  | 66778                   | 60994                   | 0.803                     | 0.572                     | 1.54                        | 1.09                       |
| 240b                                                       | 52172                  | 34708                  | 62852                   | 66840                   | 0.830                     | 0.519                     | 1.50                        | 0.94                       |
| 300a                                                       | 62421                  | 41660                  | 53896                   | 57179                   | 1.158                     | 0.729                     | 1.50                        | 0.94                       |
| 300b                                                       | 58550                  | 39960                  | 52616                   | 57497                   | 1.113                     | 0.695                     | 1.47                        | 0.92                       |
| Mean <i>t<sub>R</sub></i> (min)                            | 11.42                  | 9.42                   | 11.42                   | 9.42                    |                           |                           | 1.21                        | 1.21                       |
